# Supplementary material
Source: Elsevier journal article supplement (https://www.sciencedirect.com/science/article/pii/S0870255122000683)
Supplement: mmc1 [file S0870255122000683:mmc1.doc]

# Supplementary material

| **Supplementary Table 1** Distribution and patient characteristics according to the CAD-RADS classification. | | | | | | | |
| --- | --- | --- | --- | --- | --- | --- | --- |
|  | CAD-RADS classification | | | | | | p |
| 0  (n = 138) | 1  (n =68) | 2  (n = 40) | 3  (n = 14) | 4  (n = 12) | N  (n = 48) |  |
| Age, years | 56 (46-66) | 63 (57-73) | 62 (56-68) | 67 (61-71) | 60 (52-72) | 72 (65-75) | <0.001 |
| Male | 42 (30.4%) | 22 (32.4%) | 25 (62.5%) | 6 (42.9%) | 8 (66.7%) | 29 (60.4%) | <0.001 |
| Hypertension | 83 (60.1%) | 51 (75%) | 28 (70%) | 12 (85.7%) | 9 (75%) | 37 (77.1%) | 0.024 |
| Diabetes | 23 (16.7%) | 10 (14.7%) | 3 (7.5%) | 2 (14.3%) | 3 (25%) | 14 (29.2%) | 0.052 |
| Dyslipidemia | 65 (47.1%) | 41 (60.3%) | 24 (60%) | 11 (78.6%) | 8 (66.7%) | 30 (62.5%) | 0.033 |
| Smoking | 36 (26.1%) | 17 (25%) | 19 (47.5%) | 6 (42.9%) | 5 (41.7%) | 24 (50%) | 0.001 |
| Family history of CAD | 55 (39.9%) | 21 (30.9%) | 17 (42.5%) | 6 (42.9%) | 3 (25%) | 16 (33.3%) | 0.475 |
| Symptom typicality | | | | | | | |
| Typical angina | 13 (9.4%) | 9 (13.2%) | 3 (7.5%) | 1 (7.1%) | 6 (50%) | 13 (27.1%) | <0.001 |
| Atypical angina | 62 (44.9%) | 36 (52.9%) | 20 (50%) | 9 (64.3%) | 3 (25%) | 23 (47.9%) | 0.936 |
| Nonanginal pain | 63 (45.7%) | 23 (33.8%) | 17 (42.5%) | 4 (28.6%) | 3 (25%) | 12 (25%) | 0.009 |
| PTP, % |  |  |  |  |  |  |  |
| ESC 2013 MDF method | 28 ± 17 | 37 ± 20 | 41 ± 17 | 42 ± 19 | 55 ± 21 | 55 ± 24 | <0.001 |
| ESC 2019 new PTP method | 10 ± 8 | 16 ± 11 | 17 ± 10 | 19 ± 10 | 22 ± 16 | 26 ± 15 | <0.001 |
| CAC score | 0 (0-0) | 20 (2-54) | 62 (14-194) | 75 (5-183) | 273 (86-300) | 766 (538-1492) | <0.001 |
| CAC: coronary artery calcium; CAD: coronary artery disease; CAD-RADS: Coronary Artery Disease - Reporting and Data System; ESC: European Society of Cardiology; MDF: modified Diamond-Forrester; PTP: pretest probability. | | | | | | | |
